# Supplementary material
Source: Elsevier journal article supplement (https://www.sciencedirect.com/science/article/pii/S2173574321001945)
Supplement: mmc1 [file S2173574321001945:mmc1.pdf]

## Anexo 1. Estrategias de búsqueda

### PUBMED

("Arthritis, Rheumatoid"[Mesh:NoExp] OR "rheumatoid arthriti\*" [Title/Abstract] OR "arthritis rheumat\*" [Title/Abstract] OR "rheumatic arthritis" [Title/Abstract] OR RA [Title/Abstract] OR "Caplan Syndrome" [Mesh] OR "Caplan\* Syndrome\*" [Title/Abstract] OR "early arthritis" [Title/Abstract] OR "early rheumatoid arthritis" [Title/Abstract] OR "early RA" [Title/Abstract] OR "Inflammatory Arthritis" [Title/Abstract] OR "Rheumatology" [Mesh] OR "Rheumatology" [Title/Abstract] OR "Rheumatologists" [Mesh] OR "Rheumatologists" [Title/Abstract])

AND

("Lung Diseases, Interstitial" [Mesh] OR "Interstitial Lung\*" [Title/Abstract] OR "Lung Disease Interstitial" [Title/Abstract] OR ILD [Title/Abstract] OR "RA-ILD" [Title/Abstract] OR "Fibro\* lung disease\*" [Title/Abstract] OR "chronic connective tissue disease\*" [Title/Abstract] OR CTD [Title/Abstract] OR "Chronic Lung Disease\*" [Title/Abstract] OR "Chronic Inflammatory Lung Disease\*" [Title/Abstract] OR "Interstitial pneumoni\*" [Title/Abstract] OR "Interstitial pneumonitis" [Title/Abstract] OR UIP [Title/Abstract] OR "Pneumonia" [Mesh:NoExp] OR Pneumoni\* [Title/Abstract] OR "idiopathic interstitial pneumoni\*" [Title/Abstract] OR IIP [Title/Abstract] OR NSIP [Title/Abstract] OR "Cryptogenic Organizing Pneumonia" [Mesh] OR "Cryptogenic Organizing Pneumoni\*" [Title/Abstract] OR COP [Title/Abstract] OR "cryptogenic fibrosing alveolitis" [Title/Abstract] OR CFA [Title/Abstract] OR "Organizing Pneumoni\*" [Title/Abstract] OR "Bronchiolitis obliterans Organizing Pneumoni\*" [Title/Abstract] OR BOOP [Title/Abstract] OR "Idiopathic Pulmonary Fibrosis" [Mesh] OR "idiopathic pulmonary fibros\*" [Title/Abstract] OR "Pulmonary Fibrosis" [Mesh] OR "Pulmonary Fibrosi\*" [Title/Abstract] OR IPF [Title/Abstract] OR (interstiti\* [Title/Abstract] AND (pneumoni\* [Title/Abstract] OR lung\* [Title/Abstract] OR pulmonary [Title/Abstract] OR alveoli\* [Title/Abstract])) OR "emphysema" [Title/Abstract] OR CPFE [Title/Abstract] OR honey-combing [Title/Abstract] OR honeycombing [Title/Abstract] OR "Diffuse alveolar damag\*" [Title/Abstract] OR DAD [Title/Abstract] OR "Ground\* glass\* opacit\*" [Title/Abstract] OR GGO [Title/Abstract] OR "Thoracic Manifestation\*" [Title/Abstract])

AND

("Referral and Consultation" [Mesh] OR referr\* [Title/Abstract] OR "Patient Selection" [Mesh] OR "Patient Selection" [Title/Abstract] OR "clinical aspect" [Title/Abstract] OR "clinical feature" [Title/Abstract] OR "clinical features" [Title/Abstract] OR "clinical characteristic\*" [Title/Abstract] OR "screening criteria" [Title/Abstract] OR "Mass Screening" [Mesh:NoExp] OR "screening" [Title/Abstract] OR "Early Diagnosis" [Mesh:NoExp] OR "early diagnosis" [Title/Abstract] OR "early detection" [Title/Abstract] OR "diagnostic test" [Title/Abstract] OR "test diagnostic" [Title/Abstract] OR "diagnostic tool\*" [Title/Abstract] OR "multidisciplinary\*" [Title/Abstract])

NOT ("Clinical Conference" [Publication Type] OR "Congress" [Publication Type] OR "Consensus Development Conference" [Publication Type] OR "Published Erratum" [Publication Type] OR "Comment" [Publication Type] OR mice [Title/Abstract] OR mouse [Title/Abstract])

NOT ("Animals" [Mesh] NOT ("Animals" [Mesh] AND "Humans" [Mesh]))

Filters: Spanish; French; English

### Embase

('rheumatoid arthritis'/de OR 'rheumatoid arthritis':ab,ti OR 'arthritis rheumatoid'/de OR 'arthritis rheumatoid':ab,ti OR 'rheumatic arthritis'/de OR 'rheumatic arthritis':ab,ti OR RA:ab,ti OR "Caplan Syndrome":ab,ti OR 'early arthritis'/exp OR 'early arthritis':ti,ab OR 'early rheumatoid arthritis':ti,ab OR 'early ra':ti,ab OR 'inflammatory arthritis':ti,ab OR 'rheumatology'/exp OR 'rheumatology':ab,ti OR 'rheumatologist':ab,ti OR 'rheumatologist'/exp)

AND

('interstitial lung disease'/exp OR 'interstitial lung':ab,ti OR 'Lung Diseases Interstitial':ab,ti OR 'ild':ab,ti OR 'ra-ild':ab,ti OR "chronic connective tissue disease\*":ab,ti OR "CTD":ab,ti OR "fibrotic connective tissue disease\*":ab,ti OR "Chronic Lung Disease":ab,ti OR "Chronic Inflammatory Lung Disease":ab,ti

OR 'interstitial pneumonia'/exp OR 'interstitial pneumonia\*':ab,ti OR 'interstitial pneumonitis':ab,ti OR 'uip':ab,ti OR 'ip':ab,ti OR

"NSIP":ab,ti OR 'bronchiolitis obliterans organizing pneumonia'/exp OR "Cryptogenic Organizing Pneumonia":ab,ti OR "COP":ab,ti OR "Organizing Pneumonia":ab,ti OR "Bronchiolitis obliterans Organizing Pneumonia":ab,ti OR "BOOP":ab,ti OR "cryptogenic fibrosing alveolitis":ab,ti OR CFA:ab,ti

OR 'fibrosing alveolitis'/exp OR 'fibrosing alveolitis':ab,ti OR 'idiopathic pulmonary fibrosis':ab,ti OR 'ipf':ab,ti OR "Pulmonary Fibrosis":ab,ti OR 'lung fibrosis'/exp

OR 'pneumonia'/de OR Pneumoni\*:ab,ti OR "idiopathic interstitial pneumoni\*":ab,ti OR IIP:ab,ti OR

(interstiti\*:ab,ti AND (pneumoni\*:ab,ti OR lung:ab,ti OR pulmonary:ab,ti OR alveoli\*:ab,ti))

OR "emphysema":ab,ti OR "CPFE":ab,ti OR 'honeycombing'/exp OR honeycombing:ab,ti OR "honey- combing":ab,ti OR "Diffuse alveolar damag\*":ab,ti OR DAD:ab,ti OR "Ground\* glass\* opacit\*":ab,ti OR GGO:ab,ti OR "Thoracic Manifestation\*":ab,ti)

AND

('patient referral'/exp OR referr\*:ab,ti OR 'patient referral':ab,ti OR 'referral':ab,ti OR 'referral and consultation':ab,ti "Referral criteria":ab,ti OR 'patient selection'/exp OR 'patient selection':ab,ti OR 'clinical feature'/exp OR 'clinical aspect':ab,ti OR 'clinical feature':ab,ti OR 'clinical features':ab,ti OR 'clinical characteristics':ab,ti OR "screening criteria":ab,ti OR 'screening'/de OR "screening":ab,ti OR 'early diagnosis'/de OR 'diagnosis, early':ab,ti OR 'early diagnosis':ab,ti OR 'Early detection':ab,ti OR 'diagnostic test'/de OR 'diagnostic test':ab,ti OR 'test diagnostic':ab,ti OR 'diagnostic tool':ab,ti OR 'diagnostic tools':ab,ti OR 'multidisciplinary team'/exp OR 'multi-disciplinary team':ab,ti OR 'multidisciplinary team':ab,ti OR 'multidisciplinary approach'/exp OR 'multidisciplinary management'/exp OR multidisciplinary:ab,ti OR multi-disciplinary:ab,ti)

AND ([embase]/lim NOT [medline]/lim) AND ([english]/lim OR [french]/lim OR [spanish]/lim) NOT ('animals'/exp NOT ('animals'/exp AND 'humans'/exp)) NOT ([conference abstract]/lim OR [conference paper]/lim OR [conference review]/lim OR [erratum]/lim OR [note]/lim OR [short survey]/lim)

## Cochrane Library

ID Search Hits

- |    |                                                         |      |
|----|---------------------------------------------------------|------|
| #1 | MeSH descriptor: [Arthritis, Rheumatoid] this term only | 5703 |
| #2 | MeSH descriptor: [Rheumatology] explode all trees       | 87   |
| #3 | MeSH descriptor: [Rheumatologists] explode all trees    | 7    |

- #4 ("rheumatoid arthritis" OR "arthritis rheumatoid" OR "arthritis rheumatic" OR "rheumatic arthritis" OR RA OR "Caplan Syndrome"):ti,ab,kw 18276
- #5 ("early arthritis" OR "early rheumatoid arthritis" OR "early RA" OR "Inflammatory Arthritis" OR "Rheumatology" OR "Rheumatologists"):ab,ti,kw 7952
- #6 #1 OR #2 OR #4 OR #521911
- #7 MeSH descriptor: [Lung Diseases, Interstitial] explode all trees 784
- #8 ("Interstitial Lung" OR "Lung Disease Interstitial" OR ILD OR RA-ILD OR "Fibrosis lung disease" OR "chronic connective tissue disease" OR CTD OR "Chronic Lung Disease" OR "Chronic Inflammatory Lung Disease\*" OR "Interstitial pneumonia" OR "Interstitial pneumonitis" OR UIP):ti,ab,kw 2926
- #9 (Pneumoni\* OR "idiopathic interstitial pneumonia" OR IIP OR NSIP OR "Cryptogenic Organizing Pneumonia" OR COP OR "cryptogenic fibrosing alveolitis" OR CFA OR "Organizing Pneumonia" OR "Bronchiolitis obliterans Organizing Pneumonia" OR BOOP OR "idiopathic pulmonary fibrosis" OR "Pulmonary Fibrosis" OR IPF):ab,ti,kw 19190
- #10 MeSH descriptor: [Pneumonia] this term only 1999
- #11 MeSH descriptor: [Cryptogenic Organizing Pneumonia] 3 tree(s) exploded 4
- #12 MeSH descriptor: [Idiopathic Pulmonary Fibrosis] explode all trees 280
- #13 MeSH descriptor: [Pulmonary Fibrosis] explode all trees 498
- #14 (interstiti\* NEXT/5 (pneumoni\* OR lung OR pulmonary OR alveoli\*)):ab,ti,kw 1561
- #15 ("emphysema" OR CPFE OR "honey- combing" OR honeycombing OR "Diffuse alveolar damage" OR DAD OR "Ground glass opacity" OR GGO OR "Thoracic Manifestation"):ab,ti,kw 1856
- #16 #7 OR #8 OR #9 OR #10 OR #11 OR #12 OR #13 OR #14 OR #15 23228
- #17 #6 AND #16 506
- #18 MeSH descriptor: [Referral and Consultation] explode all trees 2208
- #19 MeSH descriptor: [Patient Selection] explode all trees 3410
- #20 (referr\* OR "Patient Selection" OR 'clinical aspect' OR "clinical feature" OR "clinical features" OR "clinical characteristics" OR "screening criteria" OR "screening" OR "early diagnosis" OR "early detection" OR multidisciplinary):ab,ti,kw 103513
- #21 MeSH descriptor: [Mass Screening] this term only 2993
- #22 MeSH descriptor: [Early Diagnosis] this term only 491
- #23 #18 OR #19 OR #20 OR #21 OR #22 103842
- #24 #17 AND #23 60

**Anexo 2. Estudios excluidos de la revisión sistemática.**

| <b>Estudio</b>                           | <b>Razones de exclusión</b>                 |
|------------------------------------------|---------------------------------------------|
| Alunno et al. 2018 <b>(1)</b>            | Intervención incorrecta                     |
| Antin-Ozerkis et al. 2008 <b>(2)</b>     | Desenlace incorrecto. Revisión narrativa    |
| Barandica et al. 2018 <b>(3)</b>         | Desenlace incorrecto. Revisión narrativa    |
| Bes et al. 2019 <b>(4)</b>               | Desenlace incorrecto. Revisión narrativa    |
| Bryson et al. 2014 <b>(5)</b>            | Revisión narrativa                          |
| ÇakmakçıKaradoğan et al. 2015 <b>(6)</b> | Intervención incorrecta                     |
| Capobianco et al. 2012 <b>(7)</b>        | Revisión narrativa                          |
| Clements et al. 2007 <b>(8)</b>          | Carta de presentación                       |
| Corley et al. 1995 <b>(9)</b>            | Revisión narrativa                          |
| Demoruelle et al. 2016 <b>(10)</b>       | Revisión narrativa                          |
| Doyle et al. 2012 <b>(11)</b>            | Población incorrecta                        |
| Duxbury et al. 2015 <b>(12)</b>          | Revisión narrativa. Francés                 |
| England et al. 2020 <b>(13)</b>          | Desenlace incorrecto. Revisión narrativa    |
| England et al. 2019 <b>(14)</b>          | Intervención incorrecta                     |
| Esposito et al. 2019 <b>(15)</b>         | Intervención incorrecta. Revisión narrativa |
| Fischer et al. 2019 <b>(16)</b>          | Intervención incorrecta. Revisión narrativa |
| Fischer et al. 2011 <b>(17)</b>          | Población incorrecta                        |
| Fong et al. 2015 <b>(18)</b>             | Intervención incorrecta. Revisión narrativa |
| Furukawa et al. 2015 <b>(19)</b>         | Intervención incorrecta                     |
| Geerts et al. 2017 <b>(20)</b>           | Intervención incorrecta Revisión narrativa  |
| Harlow et al. 2013 <b>(21)</b>           | Intervención incorrecta                     |
| Johnson et al. 2017 <b>(22)</b>          | Intervención incorrecta. Revisión narrativa |
| KalyaniPraba et al. 2017 <b>(23)</b>     | Desenlace incorrecto                        |
| Kass et al. 2020 <b>(24)</b>             | Intervención incorrecta                     |
| Kelly et al. 2014 <b>(25)</b>            | Intervención incorrecta                     |
| Lai et al. 2019 <b>(26)</b>              | Intervención incorrecta                     |
| Lake et al. 2014 <b>(27)</b>             | Intervención incorrecta. Revisión narrativa |
| Malik et al. 2012 <b>(28)</b>            | Intervención incorrecta. Revisión narrativa |
| Nakashita et al. 2014 <b>(29)</b>        | Desenlace incorrecto                        |
| O'Dwyer et al. 2013 <b>(30)</b>          | Intervención incorrecta. Revisión narrativa |
| Phillips et al. 2010 <b>(31)</b>         | Intervención incorrecta. Revisión narrativa |
| Salaffi et al. 2019 <b>(32)</b>          | Intervención incorrecta                     |
| Vatrella et al. 2007 <b>(33)</b>         | Intervención incorrecta                     |
| Verma et al. 2013 <b>(34)</b>            | Intervención incorrecta                     |
| Yu t al 2019 <b>(35)</b>                 | Intervención incorrecta                     |

## Referencias de artículos excluidos

1. Alunno A, Bistoni O, Pratesi F, Topini F, Puxeddu I, Valentini V, et al. Association between anti-citrullinated alpha enolase antibodies and clinical features in a cohort of patients with rheumatoid arthritis: a pilot study. *Reumatismo* 2018;70:67-71.
2. Antin-Ozerkis D, Rubinowitz A. Recognizing lung disease in patients with rheumatoid arthritis, part 1. *Journal of Respiratory Diseases* 2008;29:274-80.
3. Barandica D, Arnalich V, Bonilla MG, Torres MI. Diagnosis protocol of interstitial pattern in patients with systemic immune pathology. *Medicine (Spain)* 2018;12:3962-9.
4. Bes C. Comprehensive review of current diagnostic and treatment approaches to interstitial lung disease associated with rheumatoid arthritis. *Eur J Rheumatol* 2019;6:146-9.
5. Bryson T, Sundaram B, Khanna D, Kazerooni EA. Connective tissue disease-associated interstitial pneumonia and idiopathic interstitial pneumonia: similarity and difference. *Semin Ultrasound CT MR* 2014;35:29-38.
6. Çakmakçı Karadoğan D, Balkarlı A, Önal Ö, Altınışık G, Çobankara V. The role of nailfold capillaroscopy in interstitial lung diseases - can it differentiate idiopathic cases from collagen tissue disease associated interstitial lung diseases? *Tuberk Toraks* 2015;63:22-30.
7. Capobianco J, Grimberg A, Thompson BM, Antunes VB, Jasinowodolinski D, Meirelles GS. Thoracic manifestations of collagen vascular diseases. *Radiographics* 2012;32:33-50.
8. Clements P, Furst DE, Wells AU. Pulmonary complications of connective tissue disease. *Seminars in Respiratory and Critical Care Medicine* 2007;28:367-8.
9. Corley DE, Winterbauer RH. Collagen vascular diseases. *Semin Respir Infect* 1995;10:78-85.
10. Demoruelle MK, Mittoo S, Solomon JJ. Connective tissue disease-related interstitial lung disease. *Best Pract Res Clin Rheumatol* 2016;30:39-52.
11. Doyle TJ, Hunninghake GM, Rosas IO. Reply: Subclinical interstitial lung disease: No place for crackles? *American Journal of Respiratory and Critical Care Medicine* 2012;186:289-90.
12. Duxbury B, Rochat T. [Interstitial lung disease in connective tissue diseases]. *Rev Med Suisse* 2015;11:2170-2, 4-5.
13. England BR, Hershberger D. Management issues in rheumatoid arthritis-associated interstitial lung disease. *Curr Opin Rheumatol* 2020;32:255-63.
14. England BR, Roul P, Mahajan TD, Singh N, Yu F, Sayles H, et al. Performance of Administrative Algorithms to Identify Interstitial Lung Disease in Rheumatoid Arthritis. *Arthritis Care Res (Hoboken)* 2019.
15. Esposito AJ, Chu SG, Madan R, Doyle TJ, Dellaripa PF. Thoracic Manifestations of Rheumatoid Arthritis. *Clin Chest Med* 2019;40:545-60.
16. Fischer A, Streck ME, Cottin V, Dellaripa PF, Bernstein EJ, Brown KK, et al. Proceedings of the American College of Rheumatology/Association of Physicians of Great Britain and Ireland Connective Tissue Disease-Associated Interstitial Lung Disease Summit: A Multidisciplinary Approach to Address Challenges and Opportunities. *Qjm* 2019;112:81-93.
17. Fischer A, West SG, Swigris JJ, Brown KK, Du Bois RM. Response. *Chest* 2011;139:723.
18. Fong WWS, Yoong JKC. Interstitial lung disease and rheumatoid arthritis: A review. *Proceedings of Singapore Healthcare* 2015;24:35-41.
19. Furukawa H, Oka S, Shimada K, Masuo K, Nakajima F, Funano S, et al. Autoantibody profiles in collagen disease patients with interstitial lung disease (ILD): Antibodies to major

histocompatibility complex class I-related chain A (MICA) as markers of ILD. *Biomarker Insights* 2015;10:63-73.

20. Geerts S, Wuyts W, De Langhe E, Lenaerts J, Yserbyt J. Connective tissue disease associated Interstitial pneumonia: A challenge for both rheumatologists and pulmonologists. *Sarcoidosis Vasculitis and Diffuse Lung Diseases* 2017;34:326-35.

21. Harlow L, Rosas IO, Gochuico BR, Mikuls TR, Dellaripa PF, Oddis CV, et al. Identification of citrullinated hsp90 isoforms as novel autoantigens in rheumatoid arthritis-associated interstitial lung disease. *Arthritis Rheum* 2013;65:869-79.

22. Johnson C. Recent advances in the pathogenesis, prediction, and management of rheumatoid arthritis-associated interstitial lung disease. *Curr Opin Rheumatol* 2017;29:254-9.

23. Kalyani Praba P, Thamarai Selvi K, Vijay Anand B, Saravanan A. Evaluation of lung function tests in rheumatoid arthritis patients. *National Journal of Physiology, Pharmacy and Pharmacology* 2017;7:693-6.

24. Kass DJ, Nouraie M, Glassberg MK, Ramreddy N, Fernandez K, Harlow L, et al. Comparative Profiling of Serum Protein Biomarkers in Rheumatoid Arthritis-Associated Interstitial Lung Disease and Idiopathic Pulmonary Fibrosis. *Arthritis Rheumatol* 2020;72:409-19.

25. Kelly CA, Saravanan V, Nisar M, Arthanari S, Woodhead FA, Price-Forbes AN, et al. Rheumatoid arthritis-related interstitial lung disease: associations, prognostic factors and physiological and radiological characteristics--a large multicentre UK study. *Rheumatology (Oxford)* 2014;53:1676-82.

26. Lai NL, Jia W, Wang X, Luo J, Liu GY, Gao C, et al. Risk Factors and Changes of Peripheral NK and T Cells in Pulmonary Interstitial Fibrosis of Patients with Rheumatoid Arthritis. *Can Respir J* 2019;2019:7262065.

27. Lake F, Proudman S. Rheumatoid arthritis and lung disease: from mechanisms to a practical approach. *Semin Respir Crit Care Med* 2014;35:222-38.

28. Malik S, Saravanan V, Kelly C. Interstitial lung disease in rheumatoid arthritis: An update on diagnosis and management. *International Journal of Clinical Rheumatology* 2012;7:297-308.

29. Nakashita T, Ando K, Kaneko N, Takahashi K, Motojima S. Potential risk of TNF inhibitors on the progression of interstitial lung disease in patients with rheumatoid arthritis. *BMJ Open* 2014;4:e005615.

30. O'Dwyer DN, Armstrong ME, Cooke G, Dodd JD, Veale DJ, Donnelly SC. Rheumatoid Arthritis (RA) associated interstitial lung disease (ILD). *Eur J Intern Med* 2013;24:597-603.

31. Phillips K, Flaherty KR, Matteson EL, Bongartz T, Bathon J, Brown KK, et al. Interstitial lung disease in rheumatoid arthritis. *Current Rheumatology Reviews* 2010;6:120-6.

32. Salaffi F, Carotti M, Di Carlo M, Tardella M, Giovagnoni A. High-resolution computed tomography of the lung in patients with rheumatoid arthritis: Prevalence of interstitial lung disease involvement and determinants of abnormalities. *Medicine (Baltimore)* 2019;98:e17088.

33. Vatrella A, Bocchino M, Perna F, Scarpa R, Galati D, Spina S, et al. Induced sputum as a tool for early detection of airway inflammation in connective diseases-related lung involvement. *Respir Med* 2007;101:1383-9.

34. Verma SK, Saheer S, Kumar P, Kumar M, Das SK, Prasad R, et al. Respiratory manifestations among patients with connective tissue disorders. *Journal, Indian Academy of Clinical Medicine* 2013;14:28-32.

35. Yu M, Guo Y, Zhang P, Xue J, Yang J, Cai Q, et al. Increased circulating Wnt5a protein in patients with rheumatoid arthritis-associated interstitial pneumonia (RA-ILD). *Immunobiology* 2019;224:551-9.
